# Supplementary material
Source: Springer Nature journal article supplement (https://www.springermedizin.de/resource/supplementary/13256_2012_2104_MOESM3_ESM.pdf/9649010)

[Serum glucose]  
mmol/l

10.0  
7.5  
5.0  
2.5  
0.0

-100

0

100

200

300

400

Time[minutes]

[Serum insulin / C peptide]  
pmol/l (Log<sup>10</sup>)

10000  
1000  
100  
10  
1

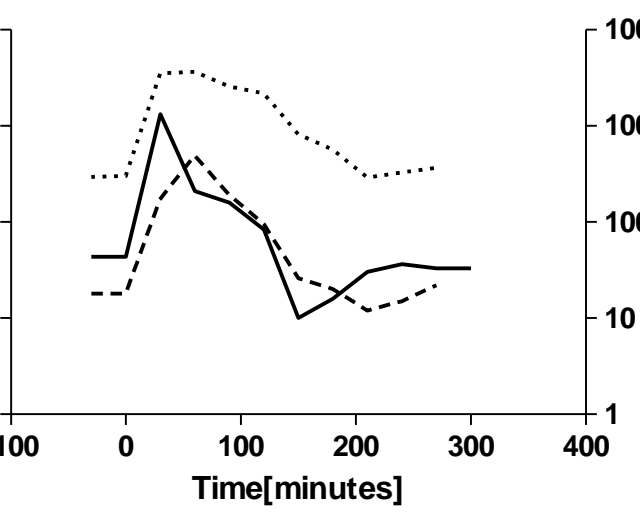

Supplement: MOESM3 [file 9649010]
